# Supplementary material
Source: bioRxiv or medRxiv preprint supplement (https://www.biorxiv.org/highwire/filestream/138461/field_highwire_adjunct_files/0/338939-1.pdf)
Supplement: Supplementary file [file 338939-1.pdf]

Supplementary Information for:

**Absolute quantification of translational regulation and burden using combined sequencing approaches**

Thomas E. Gorochowski, Irina Chelysheva, Mette Eriksen, Priyanka Nair, Steen Pedersen, Zoya Ignatova

| <b>Supplementary Figures</b>                                                                                        | <b>Page</b> |
|---------------------------------------------------------------------------------------------------------------------|-------------|
| Figure S1: Expression of the RNA spike-in standards in the RNA-Seq libraries                                        | 2           |
| Figure S2: Sequencing data exhibit a good correlation between biological replicates                                 | 3           |
| Figure S3: Comparison of ribosome protected fragments (RPFs) mapping to first and second half of each coding region | 4           |
| <br>                                                                                                                |             |
| <b>Supplementary Tables</b>                                                                                         |             |
| Table S1: Measurements of cellular parameters                                                                       | 5           |
| Table S2: Sequencing and read mapping statistics                                                                    | 6           |

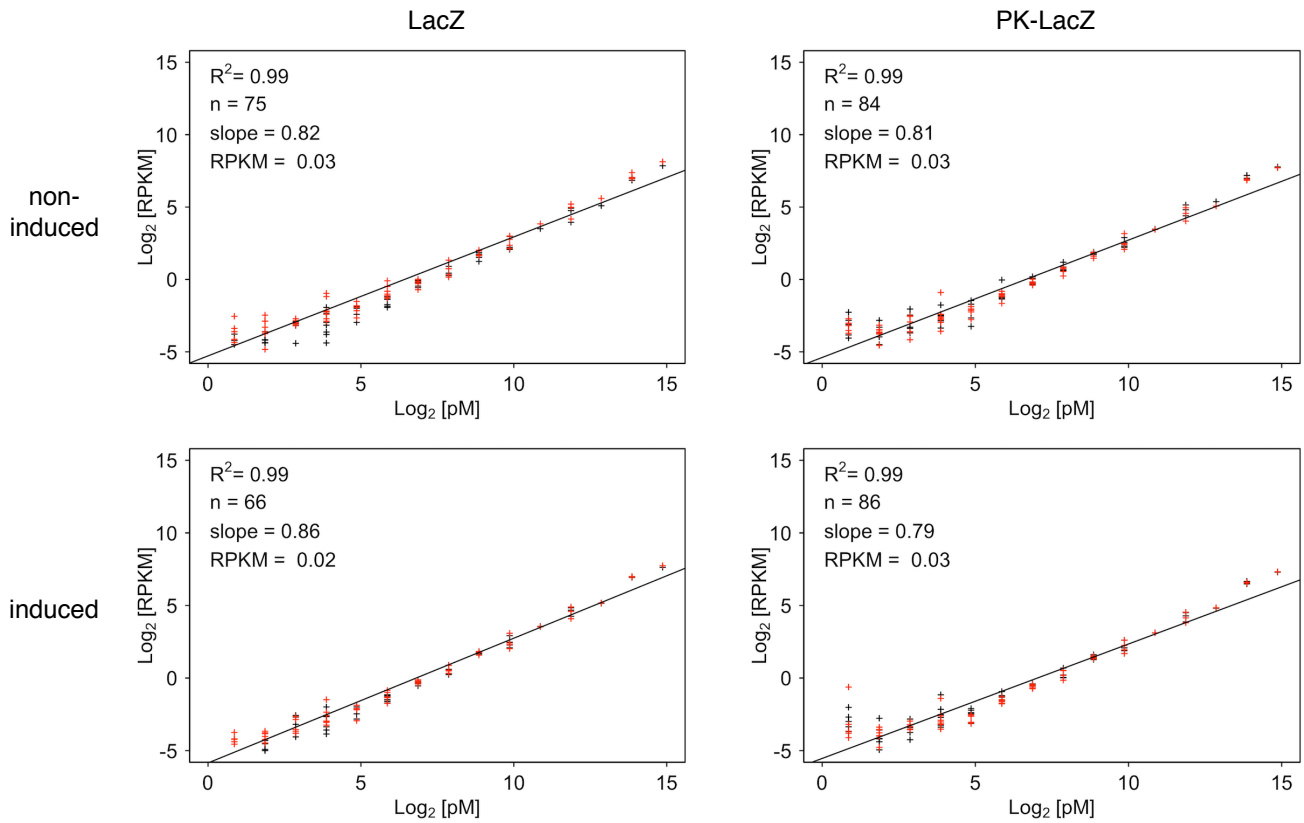

**Figure S1: Expression of the RNA spike-in standards in the RNA-Seq libraries.** Each point represents a single RNA from the spike-in mixture. Both replicates are shown in red and black, respectively. Expression of each spike-in RNA is given in Reads Per Kilobase of transcript per Million mapped reads (RPKM) units. This RPKM value sets the detection threshold in each RNA-Seq set (**Materials and Methods**). ‘n’ denotes the number of RNA standards with linear dependence of their concentration in the spike-in mixture (slope); those standards were further considered for copy number determination.  $R^2$ , Pearson correlation coefficient.

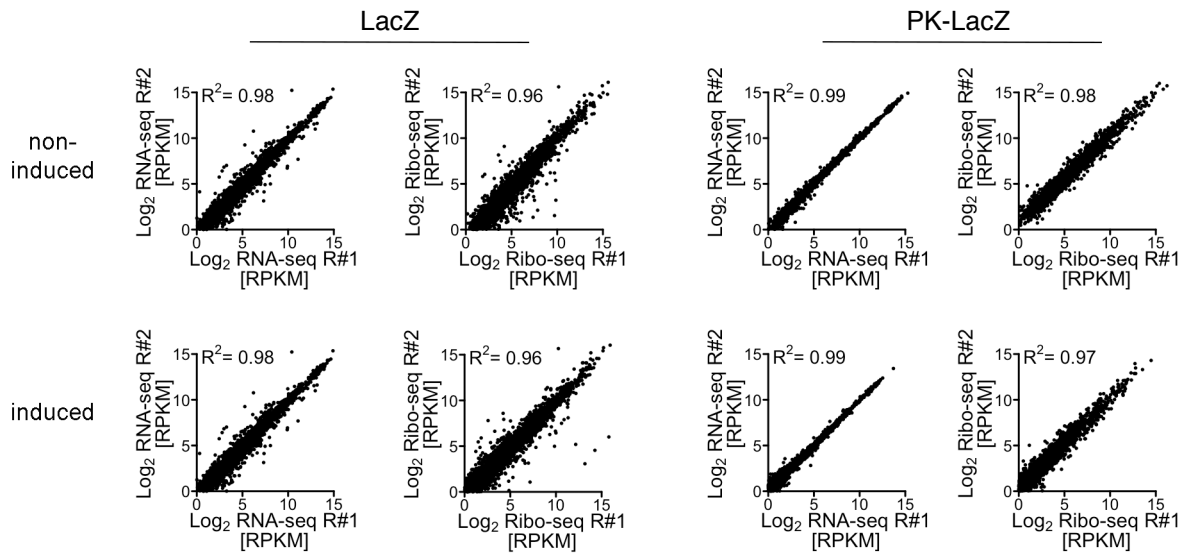

**Figure S2: Sequencing data exhibit a good correlation between biological replicates.** Correlation of the RNA-seq and Ribo-seq data of two biological replicates from induced and non-induced cells expressing either LacZ or LacZ-PK. Expression of each gene for both RNA-seq and Ribo-seq data sets given in Reads Per Kilobase of transcript per Million mapped reads (RPKM) units.  $R^2$ , Pearson correlation coefficient.

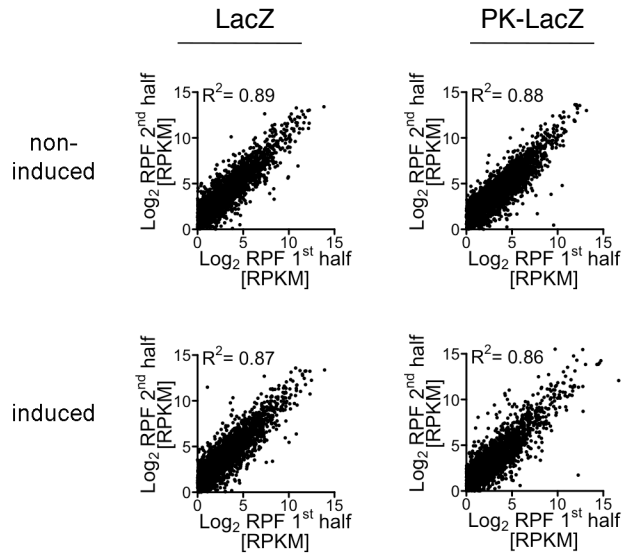

**Figure S3: Comparison of ribosome protected fragments (RPFs) mapping to first and second half of each coding region.** Each point represents a coding region with expression given in Reads Per Kilobase of transcript per Million mapped reads (RPKM) units. First 51 bp and last 9 bp not included in the calculation.  $R^2$ , Pearson correlation coefficient.

**Table S1: Measurements of cellular parameters**

| Measurement                           | Start of induction     |                        | End of induction <sup>a</sup> |                        |
|---------------------------------------|------------------------|------------------------|-------------------------------|------------------------|
|                                       | LacZ                   | PK-LacZ                | LacZ                          | PK-LacZ                |
| Doubling time (minutes)               | 85                     | 85                     | – <sup>b</sup>                | – <sup>b</sup>         |
| Cell count                            | $1.6 \times 10^9$      | $1.6 \times 10^9$      | $1.6 \times 10^9$             | $1.6 \times 10^9$      |
| Protein mass (grams/cell)             | $4.13 \times 10^{-13}$ | $4.10 \times 10^{-13}$ | $4.70 \times 10^{-13}$        | $4.30 \times 10^{-13}$ |
| Mass of LacZ/PK-LacZ as total of cell | –                      | –                      | 14%                           | 5.8%                   |

a. Induction of constructs lasted 10 min for LacZ and 15 min for PK-LacZ before samples were taken.

b. No measurable growth during the induction period.

**Table S2: Sequencing and read mapping statistics**

| Sample <sup>a</sup> |          |             |     | Total # of reads <sup>b</sup> | Multi-mapped reads <sup>c</sup> | Non-coding <sup>c</sup> | Uniquely mapped to mRNA <sup>c</sup> |
|---------------------|----------|-------------|-----|-------------------------------|---------------------------------|-------------------------|--------------------------------------|
| PK-LacZ             | RNA-seq  | non-induced | R#1 | 66066771                      | 29796556<br>(45.10%)            | 2876188<br>(4.35%)      | 33394027<br>(50.55%)                 |
| PK-LacZ             | RNA-seq  | non-induced | R#2 | 39198111                      | 18025740<br>(45.99%)            | 1673252<br>(4.27%)      | 19499119<br>(49.75%)                 |
| PK-LacZ             | RNA-seq  | induced     | R#1 | 70004102                      | 28545341<br>(40.78%)            | 1982506<br>(2.83%)      | 39476255<br>(56.39%)                 |
| PK-LacZ             | RNA-seq  | induced     | R#2 | 68146152                      | 27782049<br>(40.77%)            | 1931069<br>(2.83%)      | 38433034<br>(56.40%)                 |
| PK-LacZ             | Ribo-seq | non-induced | R#1 | 59384989                      | 25736660<br>(43.34%)            | 3034480<br>(5.11%)      | 30613849<br>(51.55%)                 |
| PK-LacZ             | Ribo-seq | non-induced | R#2 | 62798001                      | 23567687<br>(37.53%)            | 6009235<br>(9.57%)      | 33221079<br>(52.90%)                 |
| PK-LacZ             | Ribo-seq | induced     | R#1 | 56568122                      | 27566889<br>(48.73%)            | 2387216<br>(4.22%)      | 26614017<br>(47.05%)                 |
| PK-LacZ             | Ribo-seq | induced     | R#2 | 54581989                      | 20143633<br>(36.91%)            | 3541469<br>(6.49%)      | 30896887<br>(56.61%)                 |
| LacZ                | RNA-seq  | non-induced | R#1 | 192586734                     | 90755510<br>(47.12%)            | 7758247<br>(4.03%)      | 94072977<br>(48.85%)                 |
| LacZ                | RNA-seq  | non-induced | R#2 | 53735584                      | 28463851<br>(52.97%)            | 3382171<br>(6.29%)      | 21889562<br>(40.74%)                 |
| LacZ                | RNA-seq  | induced     | R#1 | 190867334                     | 91396079<br>(47.88%)            | 6916496<br>(3.62%)      | 92554759<br>(48.49%)                 |
| LacZ                | RNA-seq  | induced     | R#2 | 52249590                      | 25660126<br>(49.11%)            | 2776669<br>(5.31%)      | 23812795<br>(45.58%)                 |
| LacZ                | Ribo-seq | non-induced | R#1 | 183013690                     | 124093781<br>(67.81%)           | 11347972<br>(6.20%)     | 47571937<br>(25.99%)                 |
| LacZ                | Ribo-seq | non-induced | R#2 | 53330842                      | 25579314<br>(47.96%)            | 4072967<br>(7.64%)      | 23678561<br>(44.40%)                 |
| LacZ                | Ribo-seq | induced     | R#1 | 199707963                     | 120352995<br>(60.26%)           | 7716217<br>(3.86%)      | 71638751<br>(35.87%)                 |
| LacZ                | Ribo-seq | induced     | R#2 | 41870343                      | 31443591<br>(75.10%)            | 1843808<br>(4.40%)      | 8582944<br>(20.50%)                  |

a. Biological replicates are denoted “R#1” and “R#2” and “induced” relates to presence of IPTG (1 mM).

b. Reads aligning to more than one sequence including tRNA and rRNA were excluded from the data.

c. Sequencing reads were mapped to the genome of *E. coli* K-12 MG1655 strain.
